# Supplementary material
Source: Springer Nature journal article supplement (https://www.springermedizin.de/resource/supplementary/12889_2006_626_MOESM2_ESM.pdf/9501710)

| <b>Week</b> | <b>Activity</b> |
|-------------|-----------------|
|-------------|-----------------|

**-8**

**Recruitment**

**-2**

**Baseline assessments**

**0**

**Start of face-to-face group sessions**

**10**

**Final week of group sessions**

**14**

**First telephone follow-up**

**18**

**Second telephone follow-up**

**PASD refresher session**

**22**

**Third telephone follow-up**

**6 months**

**Assessments**

**12 months**

**Assessments**

**24 months**

**Assessments**

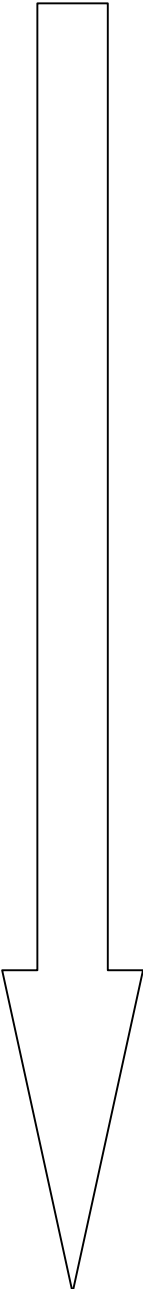

Supplement: MOESM2 [file 9501710]
